# Supplementary material for: Usefulness of Enhanced Liver Fibrosis, Glycosylation Isomer of Mac-2 Binding Protein, Galectin-3, and Soluble Suppression of Tumorigenicity 2 for Assessing Liver Fibrosis in Chronic Liver Diseases
Source: PubMed Central journal article supplement — Ann Lab Med. 2018 Mar 30;38(4):331–7. doi: 10.3343/alm.2018.38.4.331 (PMC5895862; doi:10.3343/alm.2018.38.4.331), 2018-03-30
Supplement: alm-38-331-s001.pdf [file alm-38-331-s001.pdf]

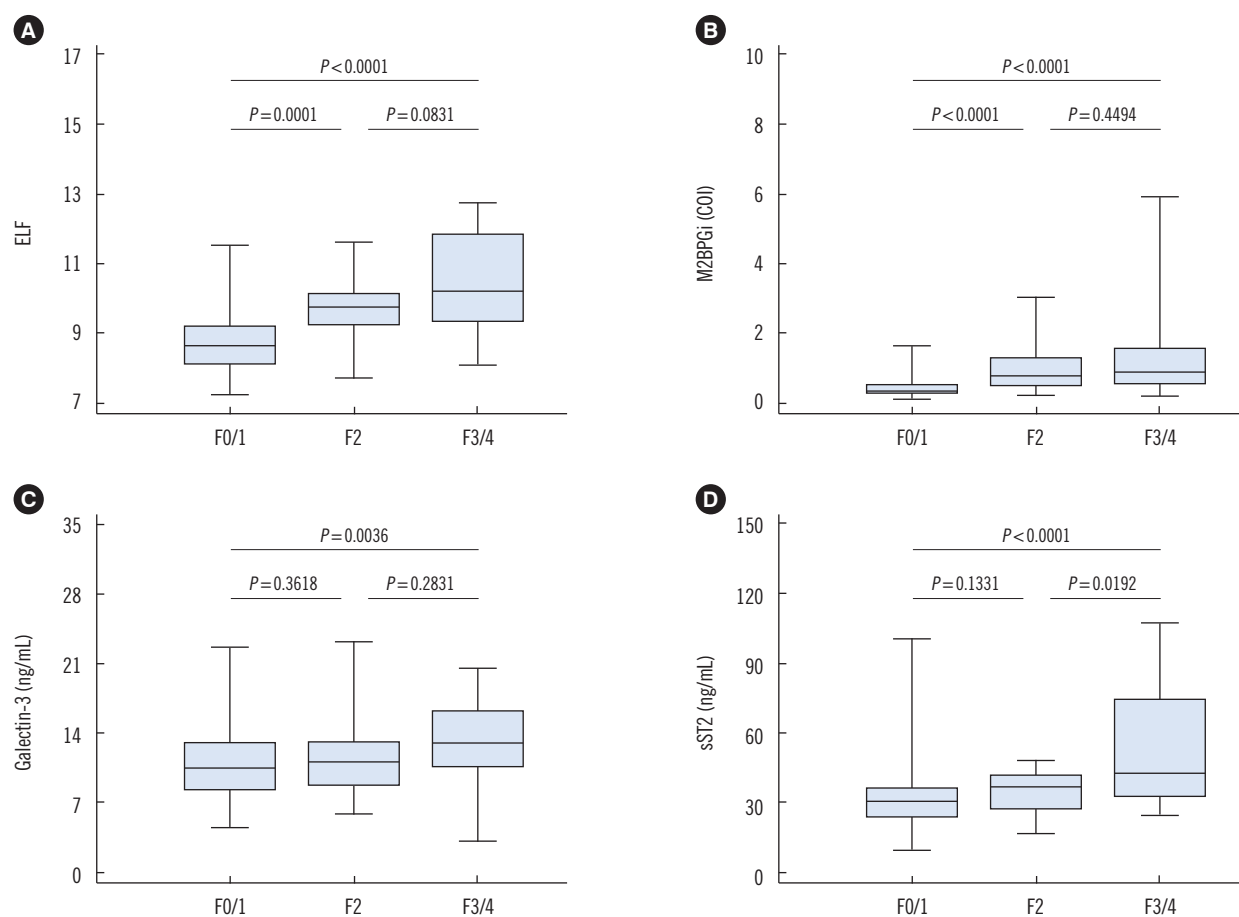

**Supplemental Data Fig. S1.** Distribution of each biomarker according to TE grade. Boxes designate the interquartile range (25 to 75 percentile) and the middle line represents the median. The error bar represents the minimum and maximum values.

Abbreviations: TE, transient elastography; ELF, enhanced liver fibrosis; M2BPGi, Mac-2-binding protein glycosylation isomer; sST2, soluble suppression of tumorigenicity 2.
